# Supplementary material
Source: PubMed Central journal article supplement (PMC4581605)
Supplement: supp_ddv296_ddv296supp_fig1.pdf [file supp_ddv296_ddv296supp_fig1.pdf]

### Supplementary Figure 1

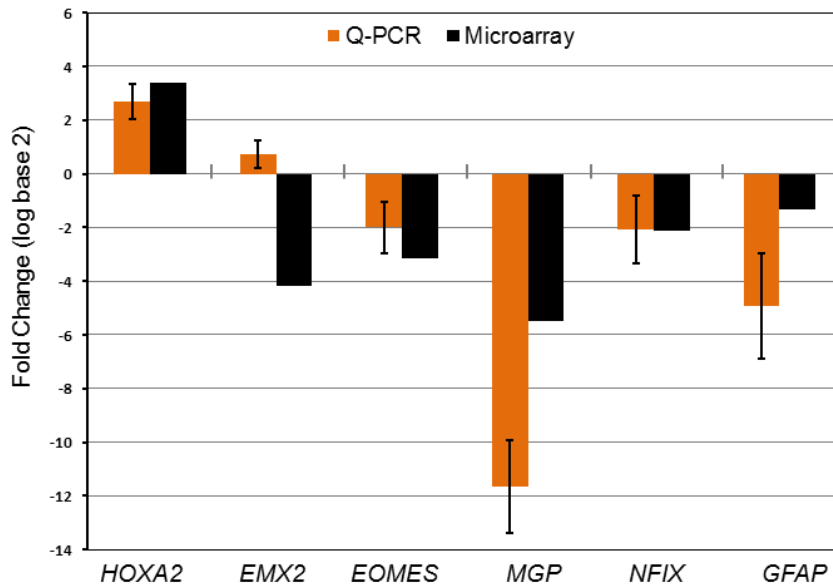

**Supplementary Figure 1.** Validation of microarray data by qRT-PCR. A selection of genes with the differential fold change (log base 2) in gene expression detected by microarray (black bars) and qRT-PCR (orange bars). Data analysis was performed using the Comparative Ct ( $\Delta\Delta C_t$ ) method normalised to GAPDH. Each data point represents a minimum of two individual reactions. Standard error of the mean is indicated. Correlation of 83% (5/6). All primers were designed to cross exon-exon junctions and are listed in Supplementary Table 1.
