# Supplementary material
Source: PubMed Central journal article supplement (PMC4581605)
Supplement: supp_ddv296_ddv296supp_table1.pdf [file supp_ddv296_ddv296supp_table1.pdf]

**Supplementary Table 1. Primer pairs used for qRT-PCR validation.**

| <b>Gene</b>  | <b>Forward Primer (5'-3')</b> | <b>Reverse Primer (5'-3')</b> |
|--------------|-------------------------------|-------------------------------|
| <i>HOXA2</i> | CAGAACCGGAGGATGAAGCA          | ACGCTAAGGGCTTGCTCAA           |
| <i>EMX2</i>  | AGAATCACTACGTGGTGGGC          | CTATTTCCCTCCGGACTCGCC         |
| <i>EOMES</i> | CGGGAGGAAGGGGAAGTTAC          | CCCCTAACTGCATGCTTTGC          |
| <i>MGP</i>   | TTTGTGTTATGAATCACATGAAAGC     | GGCTTCCCTATTGAGCTCGT          |
| <i>NFIX</i>  | GATACCAGCAGCGTGTGATGA         | CTCCTCGTCCTTCGACATCC          |
| <i>GFAP</i>  | CTGCAGATTCGAGGGGGC            | TGAGGCTCACTCCCTGTCAA          |
| <i>GAPDH</i> | GGGAGCCAAAAGGGTCATCA          | TGATGGCATGGACTGTGGTC          |
